# Supplementary material for: Interruption of Lymph Flow Worsens the Skin Inflammation Caused by Saprophytic Staphylococcus epidermidis
Source: MDPI journal article supplement (doi:10.3390/biomedicines11123234), 2023-12-06
Supplement: s1 [file s1]

**Supplementary Table S1.** Antibodies used for flow cytometry and immunohistochemistry.

| CD (antigen)            | Rat clone | Manufacturer | Concentration | Dilution   |
|-------------------------|-----------|--------------|---------------|------------|
| CD43                    | W3/13     | S            | 1.0 mg/ml     | 1:100      |
| CD4                     | W3/25     | S            | 1.0 mg/ml     | 1:100      |
| CD8                     | OX8       | S            | 1.0 mg/ml     | 1:100      |
| CD19 Ig $\kappa$ -chain | OX12      | S            | 1.0 mg/ml     | 1:100      |
| -                       | OX62      | S            | 0.1 mg/ml     | 1:30       |
| CD68                    | ED1       | S            | 0.1 mg/ml     | 1:70-1:100 |
| -                       | HiS48     | S            | -             | 1:100      |
| CD90                    | OX7       | S            | 1.0 mg/ml     | 1:100      |
| MHC CLASS II RT1B       | OX6       | S            | 1.0 mg/ml     | 1:100      |
| MHC CLASS II RT1B       | OX6 FITC  | S            | 1.0 mg/ml     | 1:100      |
| CD54 (ICAM-1)           | 1A29      | S            | 1.0 mg/ml     | 1:50       |
| IgG1                    | -         | S            | 0.1 mg/ml     | 1:10       |
| IgG2a                   | -         | S            | 0.1 mg/ml     | 1:10       |
| IgG1 PE                 | R3-34     | BD           | 0.1 mg/ml     | 1:10       |
| IgG PE                  | Poly24030 | BL           | 0.1 mg/ml     | 1:10       |
| IgG1 FITC               | R3-34     | BD           | 0.1 mg/ml     | 1:10       |
| IgG FITC                | HTK888    | BL           | 0.5 mg/ml     | 1:10       |

S: Serotec Ltd, Kidlington, United Kingdom; BD: Becton Dickinson Biosciences Pharmingen,

San Jose, CA, USA; BL: Bio Legend, San Diego, CA, USA.

**Supplementary Table S2.** The mean number  $\pm$  standard deviation of positively stained cells from four representative fields of view (magnification 400 $\times$ ) of popliteal lymph nodes section.

|                                                         | T helper<br>lymphocytes,<br>monocytes<br>CD4+ | Granulocytes<br>HiS48+ | Dendritic<br>cells<br>OX62+ | Macrophages,<br>monocytes<br>CD68+ | Stem cells,<br>immature<br>B cells<br>CD90+ |
|---------------------------------------------------------|-----------------------------------------------|------------------------|-----------------------------|------------------------------------|---------------------------------------------|
| Control                                                 | 416 $\pm$ 86                                  | 35 $\pm$ 9             | 168 $\pm$ 68                | 91 $\pm$ 19                        | 122 $\pm$ 21                                |
| <i>S. epidermidis</i>                                   | 192 $\pm$ 53                                  | 138 $\pm$ 30           | 75 $\pm$ 13                 | 159 $\pm$ 16                       | 196 $\pm$ 12                                |
| Interruption of<br>lymphatics                           | 354 $\pm$ 40                                  | 48 $\pm$ 22            | 42 $\pm$ 9                  | 122 $\pm$ 19                       | 149 $\pm$ 25                                |
| Interruption of<br>lymphatics,<br><i>S. epidermidis</i> | 186 $\pm$ 38                                  | 48 $\pm$ 9             | 45 $\pm$ 12                 | 107 $\pm$ 15                       | 114 $\pm$ 7                                 |

**Supplementary Table S3.** The mean number  $\pm$  standard deviation of positively stained cells from three representative fields of view (magnification 400 $\times$ ) of skin sections.

|                                                         | MHC class II antigen<br>presenting cells (dendritic<br>cells, macrophages,<br>lymphocytes) | Macrophages,<br>monocytes CD68+ | Stem cells, immature<br>B cells CD90+ |
|---------------------------------------------------------|--------------------------------------------------------------------------------------------|---------------------------------|---------------------------------------|
| <i>S. epidermidis</i>                                   | 108 $\pm$ 40                                                                               | 120 $\pm$ 33                    | 124 $\pm$ 30                          |
| Interruption of<br>lymphatics,<br><i>S. epidermidis</i> | 222 $\pm$ 16                                                                               | 377 $\pm$ 19                    | 280 $\pm$ 38                          |

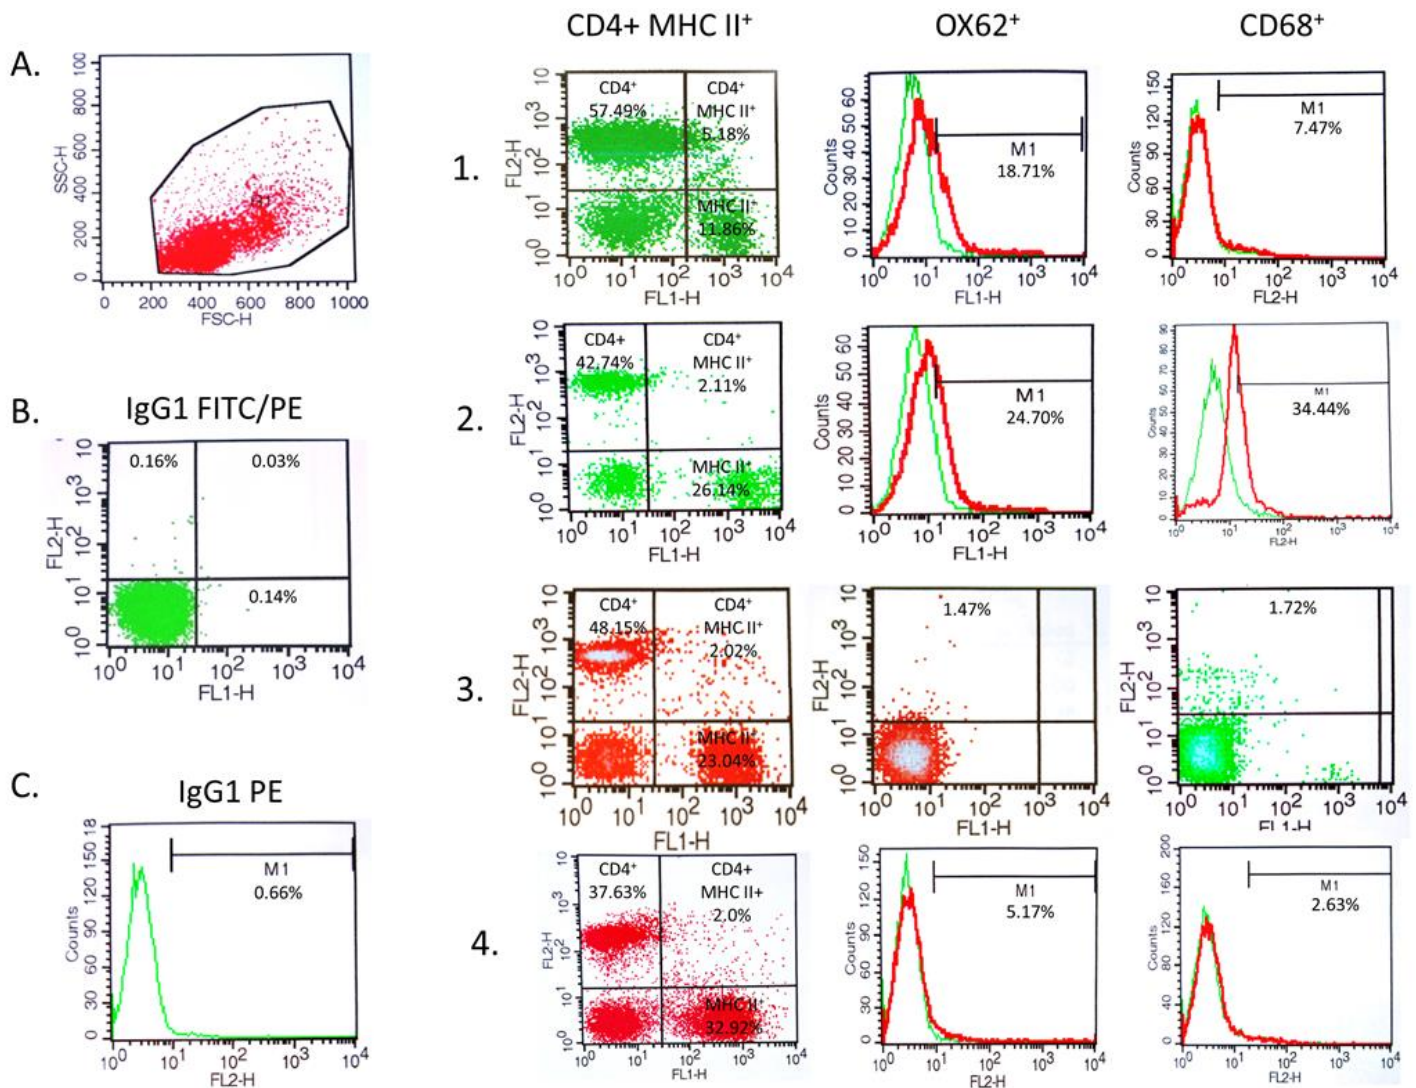

**Supplementary Figure S1.** Example of flow cytometry gating strategy (the Cell Quest Pro program, Becton Dickinson) for leukocyte populations isolated from popliteal lymph nodes. Dot plots or histograms are presented for the CD4<sup>+</sup>, MHC II<sup>+</sup>, CD4<sup>+</sup> MHC II<sup>+</sup>, OX62<sup>+</sup> and CD68<sup>+</sup> subpopulations. A. Dot plots of physicochemical properties of cells. FSC-H: Forward Scatter Channel high peak. SSC-H: Side Scatter Channel high peak. B. and C. isotypic controls.

1. Control: normal lymph flow and  $7 \times 0.9\%$  NaCl injection. 2. *S. epidermidis*: normal lymph flow and  $7 \times$  infection with *S. epidermidis*. 3. Interruption of lymphatics: lymph stasis and  $7 \times 0.9\%$  NaCl injection. 4. Interruption of lymphatics and *S. epidermidis*: lymph stasis and  $7 \times$  infection with *S. epidermidis*.
